# Supplementary material for: The Development and Validation of the “Hippocratic Hypertension Self-Care Scale”
Source: MDPI journal article supplement (doi:10.3390/healthcare11182579), 2023-09-18
Supplement: s1 [file s1]

**Supplementary Materials:**

Table S1: Hippocratic hypertension self-care scale

Please, read carefully the following sentences and choose the most appropriate answer, based on your self-behavior regarding medication, diet, exercise, lifestyle, and medical follow-up for the management of arterial hypertension. Select the appropriate number which best describes the frequency of each behavior.

| During the last month, how often did you...                                                       | Never | Rarely | Sometimes | Always | Often |
|---------------------------------------------------------------------------------------------------|-------|--------|-----------|--------|-------|
| 1. Forget to take your medicine for arterial hypertension;                                        | 0     | 1      | 2         | 3      | 4     |
| 2. Omit to take your medicine for arterial hypertension because of its side effect;               | 0     | 1      | 2         | 3      | 4     |
| 3. Omit to take your medicine for arterial hypertension since you felt better;                    | 0     | 1      | 2         | 3      | 4     |
| 4. Omit to take your medicine for arterial hypertension when you were outside (eg, travel, work); | 0     | 1      | 2         | 3      | 4     |
| 5. Adapt the dose of the medicine for hypertension as your doctor suggested;                      | 0     | 1      | 2         | 3      | 4     |
| 6. Eat fruit and vegetables;                                                                      | 0     | 1      | 2         | 3      | 4     |
| 7. Eat fatty foods;                                                                               | 0     | 1      | 2         | 3      | 4     |
| 8. Eat salty foods (eg. Tinned food, cold meat, feta);                                            | 0     | 1      | 2         | 3      | 4     |
| 9. Shake salt on your food;                                                                       | 0     | 1      | 2         | 3      | 4     |
| 10. Read the label of food as for lipids and salt;                                                | 0     | 1      | 2         | 3      | 4     |

| During the last month how often did you...                                                                                             | Never | Rarely | Sometimes | Always | Often |
|----------------------------------------------------------------------------------------------------------------------------------------|-------|--------|-----------|--------|-------|
| 11. Try to maintain a desired body weight;                                                                                             | 0     | 1      | 2         | 3      | 4     |
| 12. Omit to exercise as your doctor suggested;                                                                                         | 0     | 1      | 2         | 3      | 4     |
| 13. Drink more than 2 units of alcohol (eg, whiskey, vodka) (for the men) and 1 unit (for the women) at daily basis;                   | 0     | 1      | 2         | 3      | 4     |
| 14. Drink more than 2 glasses of wine or 2 tin of beer (for the men)/ 1 glass of wine or 1 tin of beer (for the women) at daily basis; | 0     | 1      | 2         | 3      | 4     |
| 15. Smoke;                                                                                                                             | 0     | 1      | 2         | 3      | 4     |
| 16. Measure your blood pressure daily;                                                                                                 | 0     | 1      | 2         | 3      | 4     |
| During the last year, how often did you...                                                                                             |       |        |           |        |       |
| 17. Miss your scheduled appointment;                                                                                                   | 0     | 1      | 2         | 3      | 4     |
| 18. Miss the recommend check up;                                                                                                       | 0     | 1      | 2         | 3      | 4     |
